# Supplementary material for: Ammonia Production by Streptomyces Symbionts of Acromyrmex Leaf-Cutting Ants Strongly Inhibits the Fungal Pathogen Escovopsis
Source: MDPI journal article supplement (doi:10.3390/microorganisms9081622), 2021-07-29
Supplement: s1 [file s1]

## Supporting Information

### **Ammonia Production by *Streptomyces* Symbionts of *Acromyrmex* Leaf-cutting Ants Strongly Inhibits the Fungal Pathogen *Escovopsis***

Basanta Dhodary<sup>1</sup> and Dieter Spiteller<sup>1\*</sup>

<sup>1</sup>Chemical Ecology/Biological Chemistry, University of Konstanz, Universitätsstrasse 10,  
78457 Konstanz, Germany.

\*corresponding author

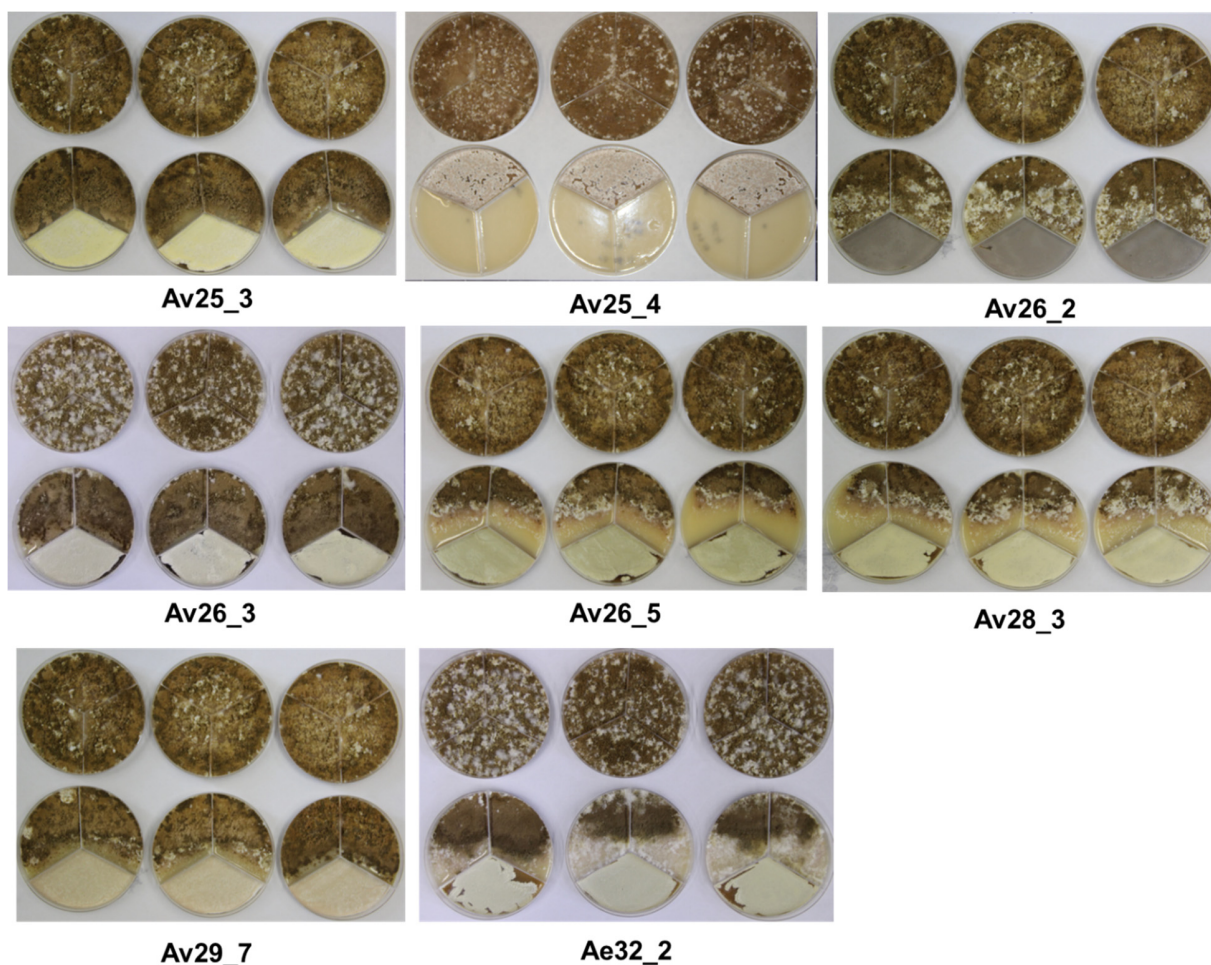

**Figure S1.** Screening *Streptomyces* symbionts from leaf-cutting ants for the production of volatile antifungal compounds that inhibit the growth of *E. weberi* using the three compartment petri dishes to only allow growth inhibition by volatile compounds. Each picture exhibits the bioassay for one *Streptomyces* symbiont after 10 day of incubation. Three replicates of *E. weberi* control plates (top row) and *E. weberi* co-culture plates (bottom row) are shown in each picture (acronym of name below picture). The tested strains were: *Streptomyces* sp. Av25\_3, *Streptomyces* sp. Av25\_4, *Streptomyces* sp. Av26\_2, *Streptomyces* sp. Av26\_3, *Streptomyces* sp. Av26\_5, *Streptomyces* sp. Av29\_7, *Streptomyces* sp. Av28\_2, *Streptomyces* sp. Av28\_3, and *Streptomyces* sp. Ae32\_2.

**Table S1.** *Streptomyces* symbionts used to screen for volatiles with antifungal activity against *E. weberi*.

| Strains                        | Accession number | Isolated from       | Growth inhibition of <i>E. weberi</i> mediated by volatile compounds |
|--------------------------------|------------------|---------------------|----------------------------------------------------------------------|
| <i>Streptomyces</i> sp. Av25_3 | FJ490533         | <i>A. volcanus</i>  | +                                                                    |
| <i>Streptomyces</i> sp. Av25_4 | FJ490534         | <i>A. volcanus</i>  | +++                                                                  |
| <i>Streptomyces</i> sp. Av26_2 | FJ490537         | <i>A. volcanus</i>  | +                                                                    |
| <i>Streptomyces</i> sp. Av26_3 | HM538453         | <i>A. volcanus</i>  | No                                                                   |
| <i>Streptomyces</i> sp. Av26_5 | FJ490538         | <i>A. volcanus</i>  | ++                                                                   |
| <i>Streptomyces</i> sp. Av28_3 | FJ490540         | <i>A. volcanus</i>  | ++                                                                   |
| <i>Streptomyces</i> sp. Av29_7 | FJ490541         | <i>A. volcanus</i>  | +                                                                    |
| <i>Streptomyces</i> sp. Ae32_2 | FJ490544         | <i>A. echinator</i> | +                                                                    |

**+++ very strong inhibition**

**++ inhibition**

**+ weak inhibition**

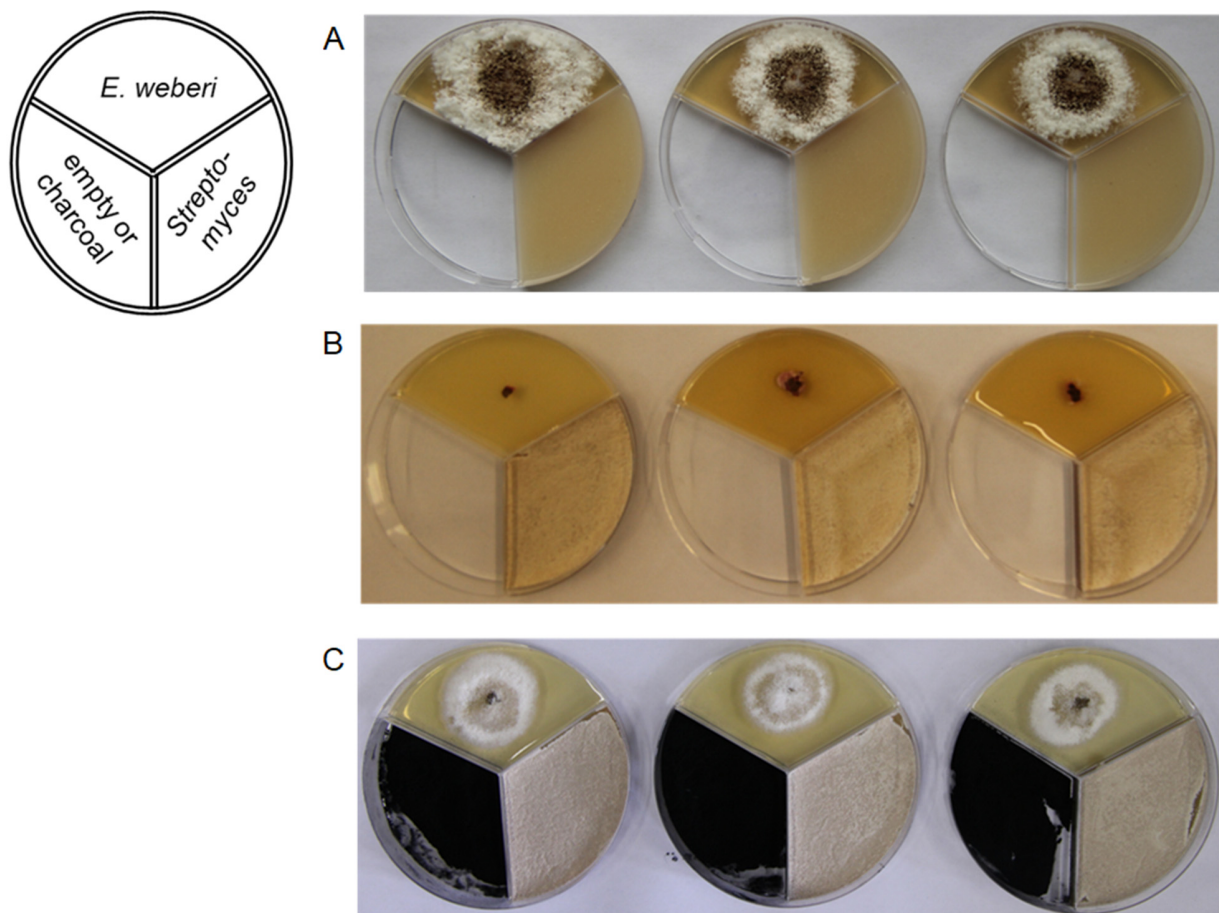

**Figure S2.** Three compartment bioassay to identify volatile compounds inhibiting the growth of *E. weberi*. A) agar plates with 4 d grown *E. weberi* in the second compartment, SFM medium in first compartment and empty third compartment. B) plates with 4d grown *E. weberi* in second compartment, 7 d grown *Streptomyces* sp. Av25\_4 in the first compartment and empty third compartment. C) Agar plates with 4 d grown *E. weberi* in second compartment, 7 d grown *Streptomyces* sp. Av25\_4 in first compartment and 2 g charcoal in third compartment. The presence of charcoal led to a reduced growth inhibition compared to the growth of the *E. weberi*/*Streptomyces* sp. Av25\_4 co-culture.



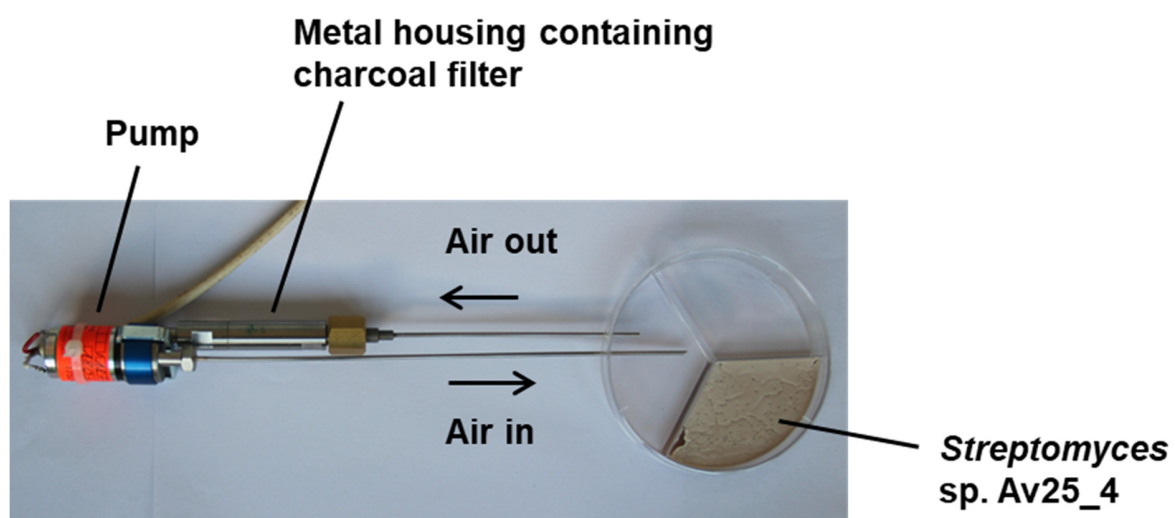

**Figure S3.** Closed loop stripping. Collection of volatiles produced by *Streptomyces* sp. Av25\_4 grown on SFM agar by using closed loop stripping [1].

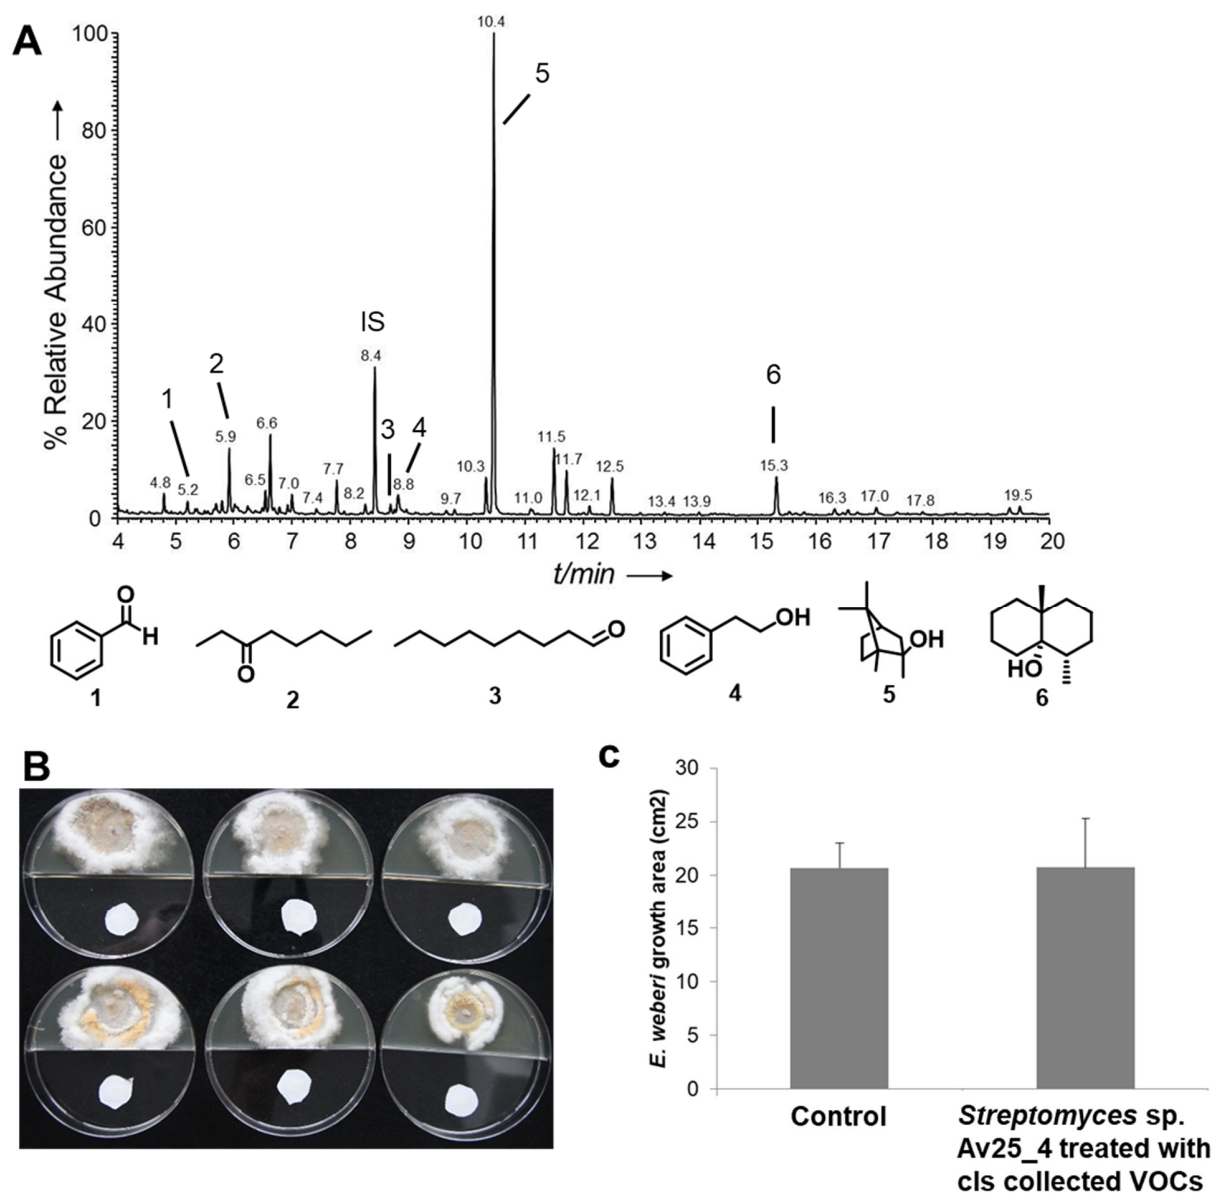

**Figure S4.** A) Organic volatile compounds from *Streptomyces* sp. Av25\_4. GC-MS analysis of collected volatiles produced by *Streptomyces* sp. B) Av25\_4 grown on SFM agar. C) Total ion chromatogram of the volatiles produced by *Streptomyces* sp. Av25\_4. Structures of identified volatiles produced by *Streptomyces* sp. Av25\_4 are given below the chromatogram (IS internal standard – bromodecane).

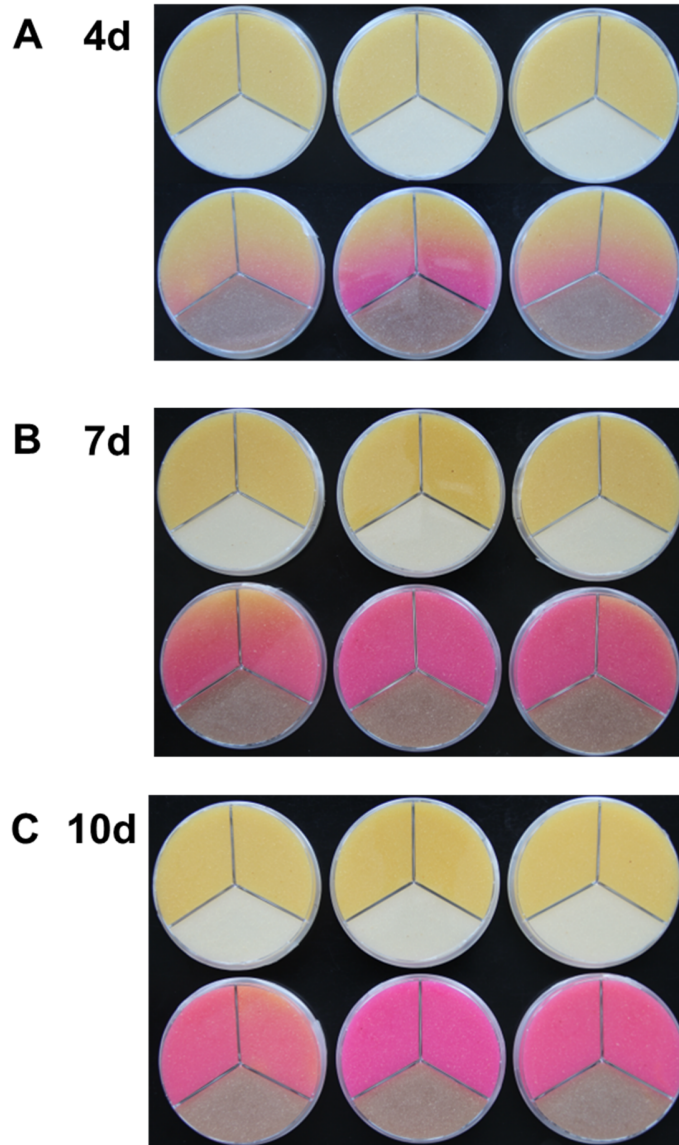

**Figure S5.** Monitoring pH change in Petri dishes. pH change revealed by the color change of the pH indicator phenol red (pH > 7.3 purple, 0.002 %) in the second and third compartment filled with SFM medium [2]. Ammonia produced by *Streptomyces* sp. Av25\_4 grown on first compartment induced the pH change in compartment 2 and 3. Top row: control plates with SFM agar in the first compartment and 0.002 % phenol red indicator in second and third compartment. Bottom row: plates with *Streptomyces* sp. Av25\_4 growing in the first compartment and 0.002 % phenol red indicator in second and

third compartment. Pictures were taken at day 4, 7 and 10. All samples and controls were performed in triplicate.

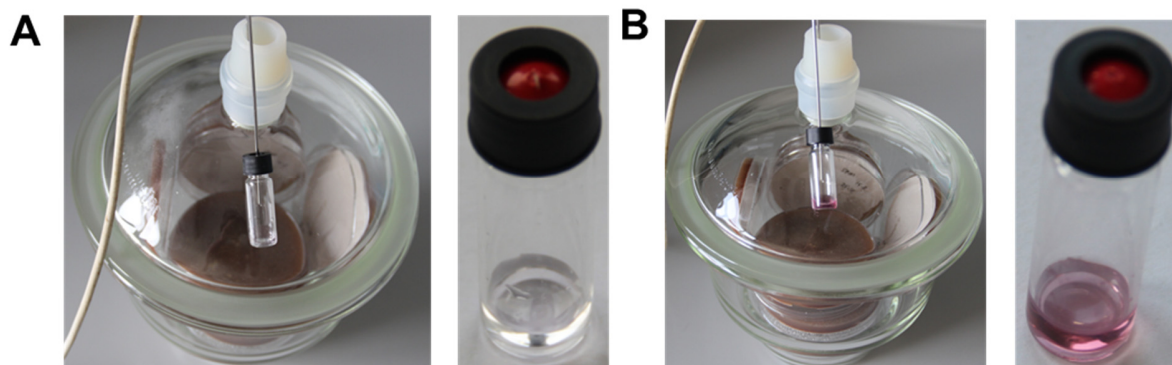

**Figure S6.** Detection of ammonia produced by *Streptomyces* sp. 25\_4 using a closed loop stripping pump transferring the volatiles into the vial with the OPA derivatization reagent. A) Colorless derivatization solution before exposure to the volatiles in the headspace of the desiccator filled with *Streptomyces* sp. 25\_4 agar plates. B) Reddish color after exposure of the OPA derivatization reagent to the headspace volatiles indicating the formation of ammonia.

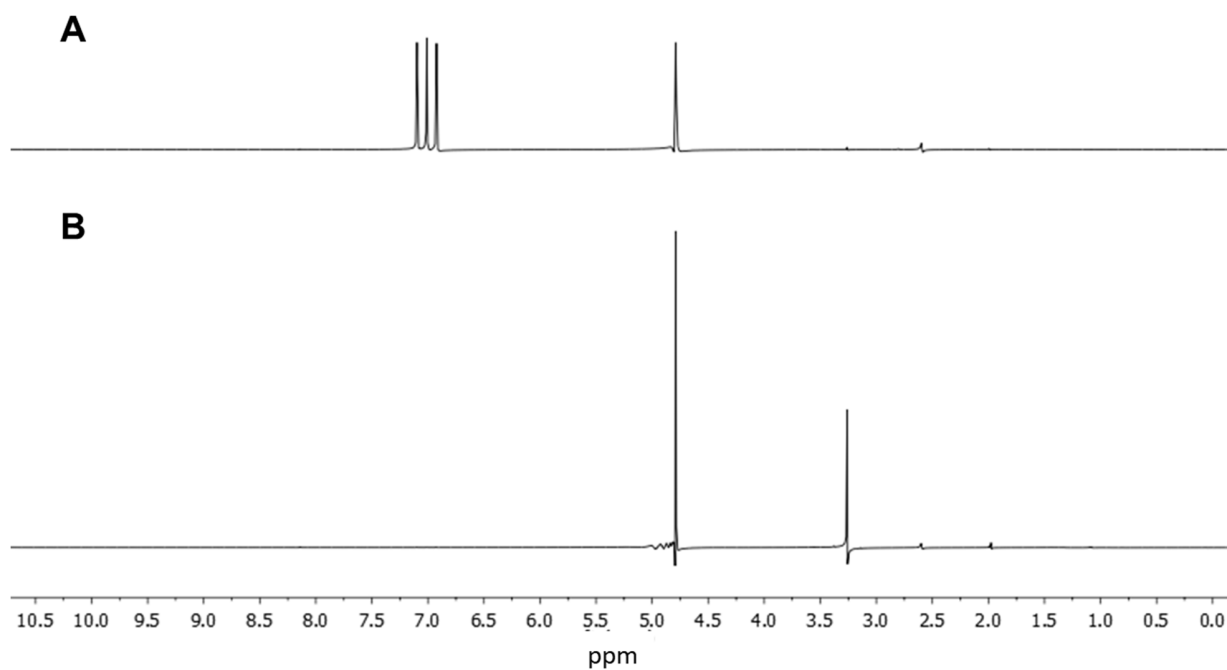

**Figure S7.** Identification of ammonia as the pH changing principle using  $^1\text{H}$ -NMR spectroscopy.  $^1\text{H}$ -NMR spectra (600 MHz) of A) *Streptomyces* sp. Av25\_4 produced volatiles exposed 250 mM HCl solution, B) SFM agar plates produced volatiles exposed 250 mM HCl solution as control [4].



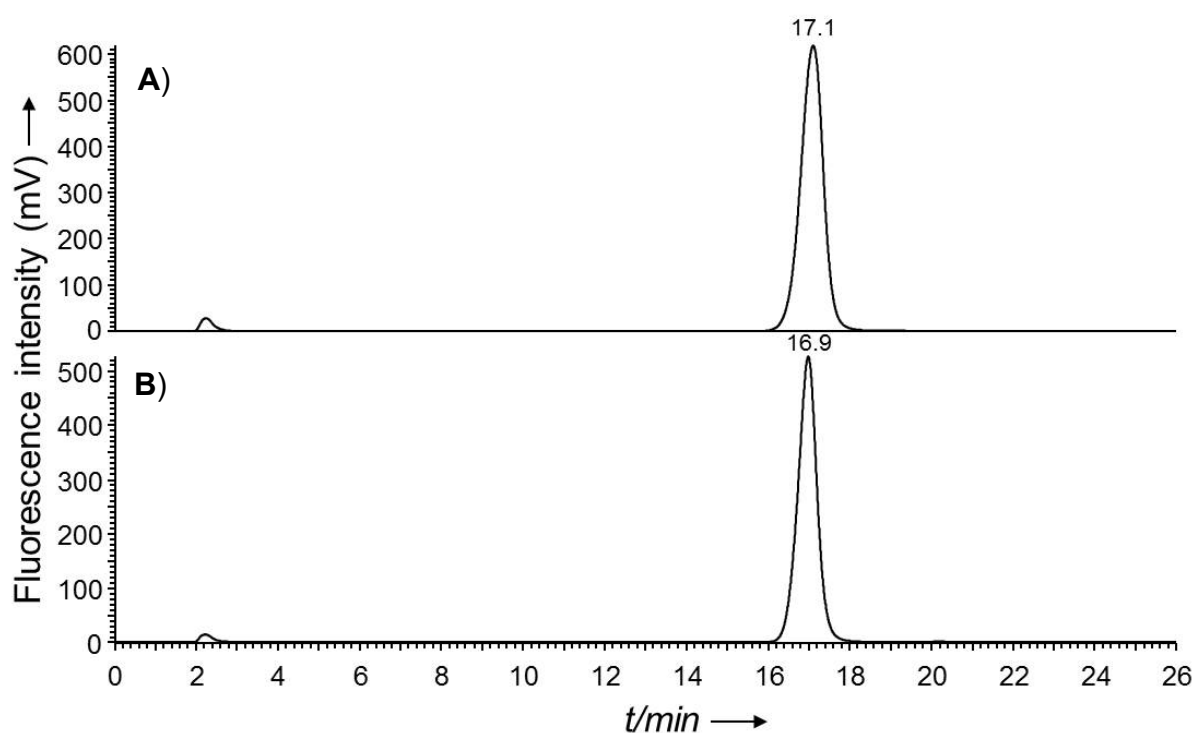

**Figure S8.** Identification of ammonia as pH changing principle using *ortho*-phthalaldehyde derivatization [3]. Fluorescence signal measured for the identification of ammonia at excitation and emission wavelength of 360 nm and 420 nm for A) 7d grown *Streptomyces* sp. 25\_4 produced headspace volatiles B) 5 mM ammonia standard.

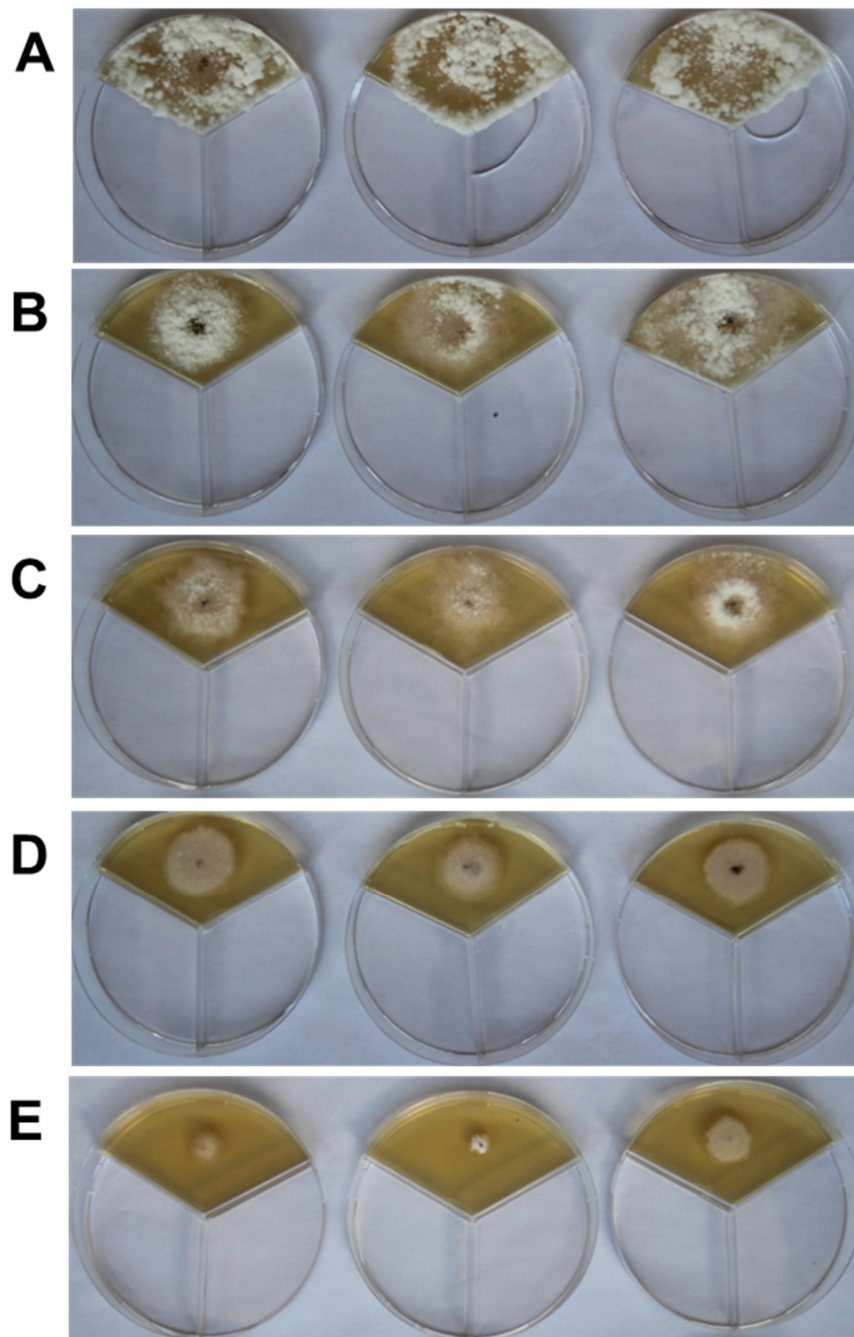

**Figure S9.** Three compartment Petri dish bioassay evaluating the effect of ammonia on *E. weberi* growth: The first compartment contains 4 d grown *E. weberi*, the second compartment contains 5 ml of sterile water or an ammonia solution in water. The third compartment was left empty. A) sterile water, B) 5 mM ammonia solution, C) 7 mM ammonia solution, D) 9 mM ammonia solution, and E) 11 mM ammonia solution.

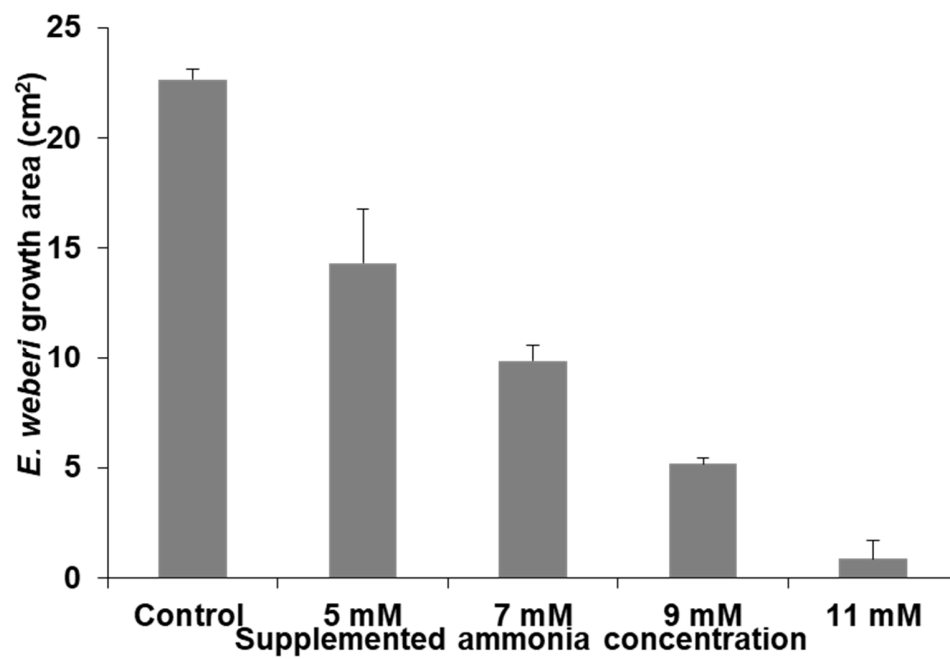

**Figure S10.** Effect of ammonia on *E. weberi* growth. Quantification of *E. weberi* mycelium growth by analysis of the growth area using image J (3 replicates).

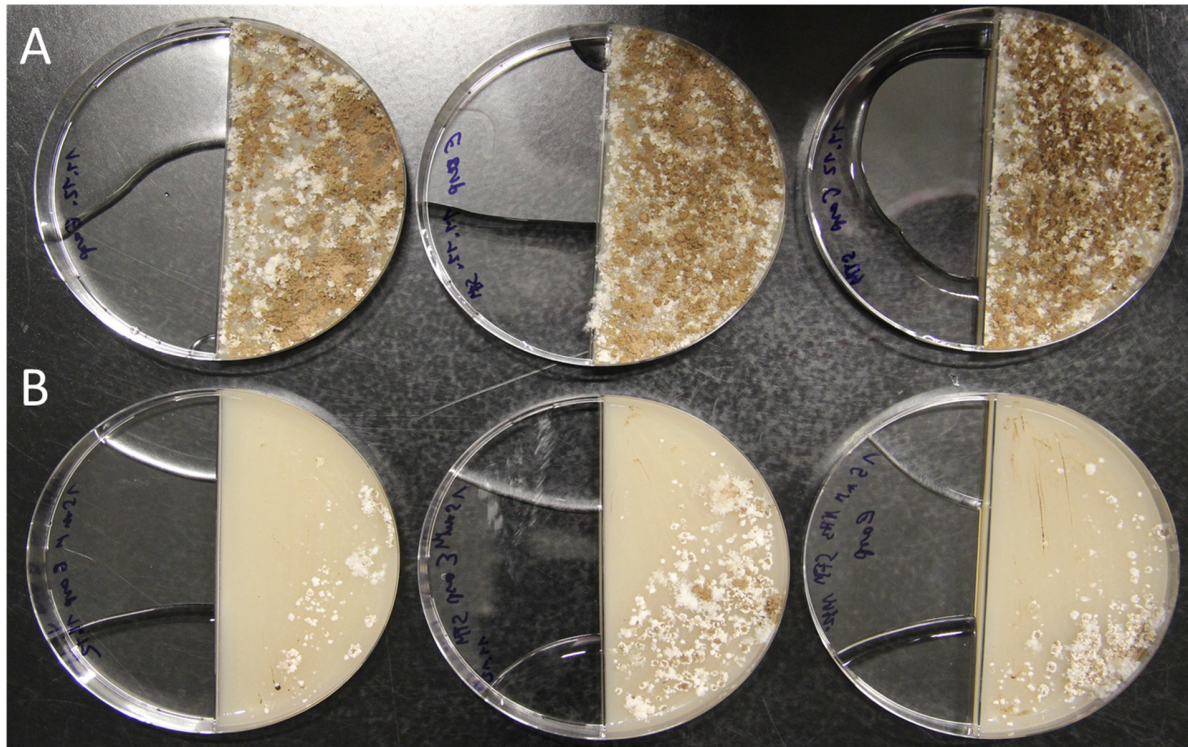

**Figure S11.** Growth of *E. aspergilloides* in presence of ammonia on SFM agar plates. B) 15 mM ammonia (5 ml) was added into the second compartment on the day of inoculation and A) *E. aspergilloides* without treatment (control). *E. aspergilloides* was grown for 10 d.

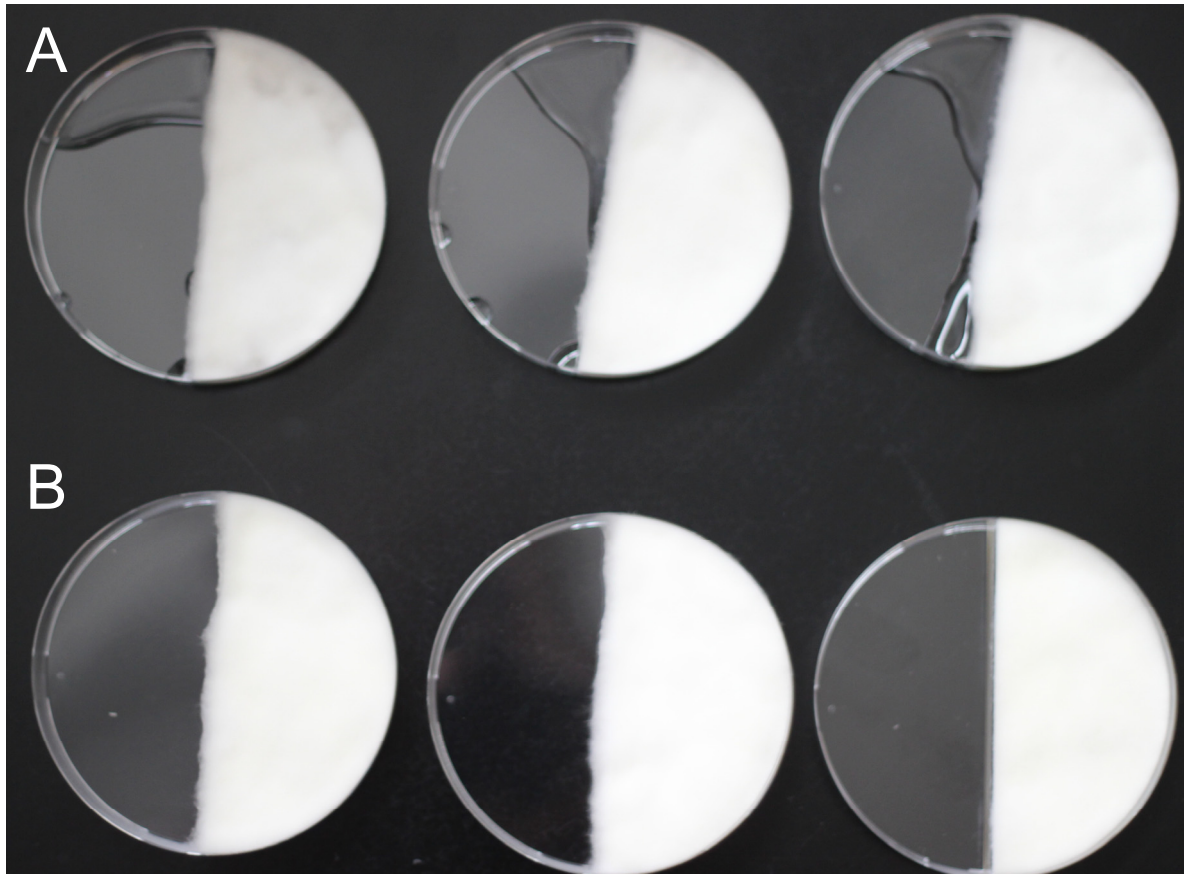

**Figure S12.** Growth of *F. equiseti* in presence of ammonia on SFM agar plates. A) 10 mM ammonia (5 ml) was added into the second compartment on the day of inoculation and B) *F. equiseti* without treatment (control). *F. equiseti* was grown for 7 d.



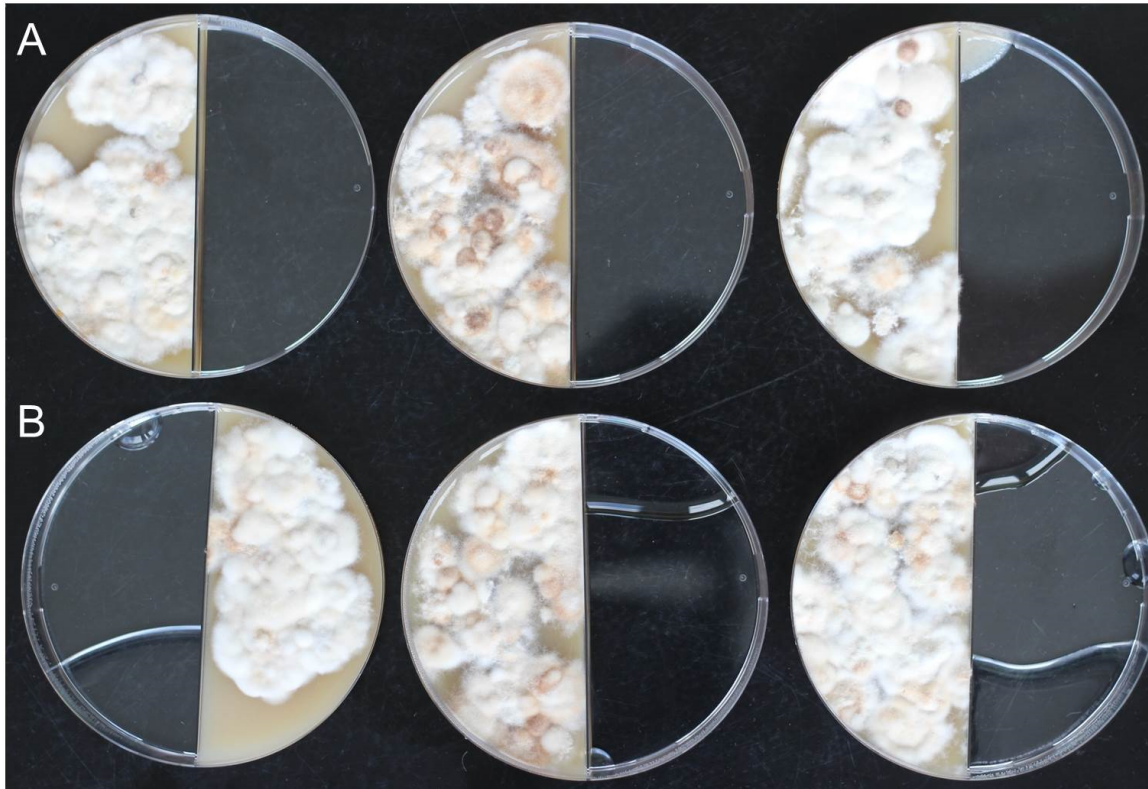

**Figure S13.** Influence of ammonia on the growth of *L. gongylophorus*. A) *L. gongylophorus* grown on SFM agar plates in one compartment in the second compartment 10 mM ammonia (5 ml) was added on the day of inoculation and B) *L. gongylophorus* without addition of ammonia (control), growth for 3 weeks.

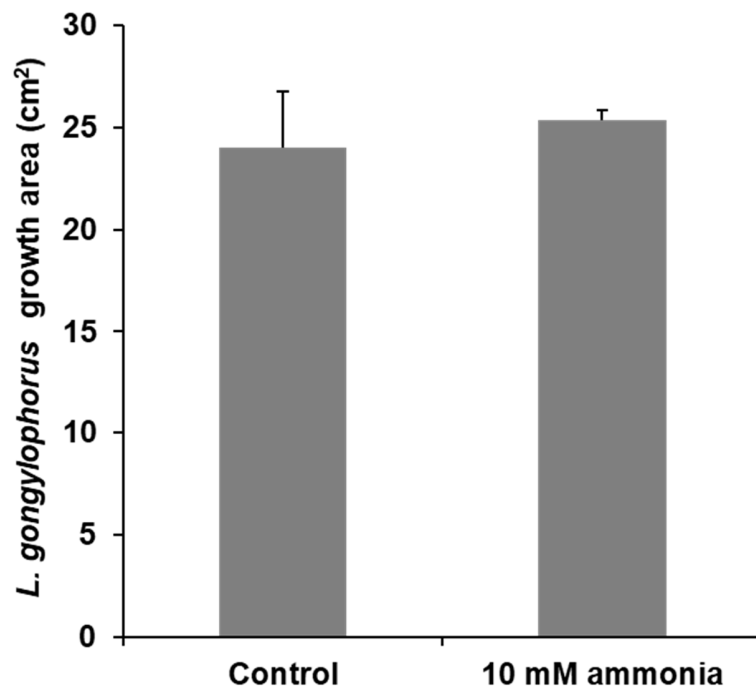

**Figure S14.** Effect of ammonia on *L. gongylophorus* growth. Quantification of *L. gongylophorus* growth by analysis of the growth area using image J (3 replicates).

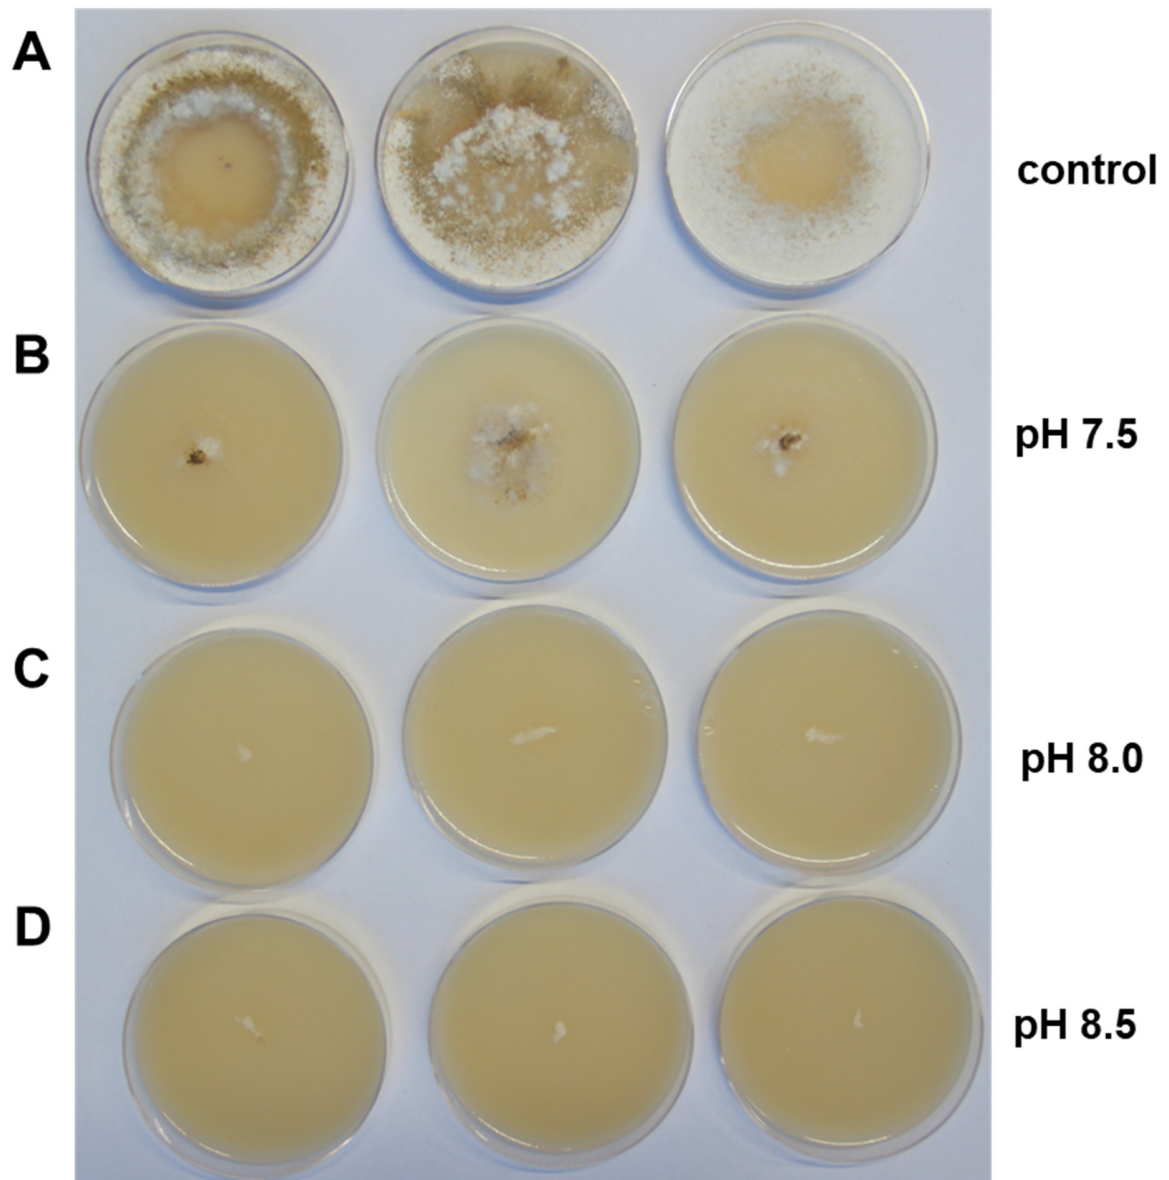

**Figure S15.** Growth of *E. weberi* on SFM agar plates at different pH adjusted with sodium hydroxide. A) Untreated SFM agar plates (pH 6.2). B) SFM agar plates adjusted to pH 7.5. C) SFM agar plates adjusted to pH 8.0. D) SFM agar plates adjusted to pH 8.5.

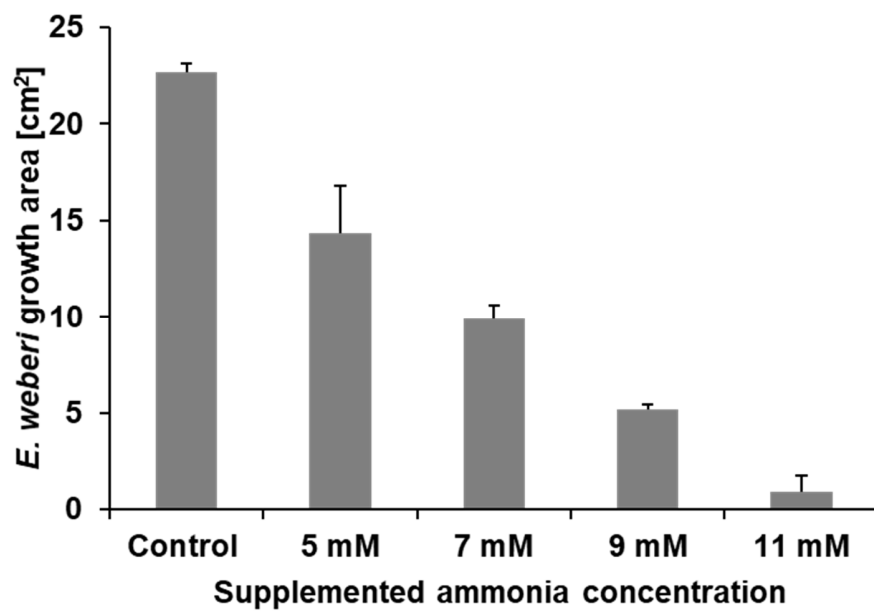

**Figure S16.** Effect of basic pH on *E. weberi* growth. Quantification of *E. weberi* growth by analysis of the growth area using image J (3 replicates).

**Table S2.** pH of the waste of different *Acromyrmex* (Hymenoptera: Formicidae: Myrmicinae) and *Atta* (Hymenoptera: Formicidae: Myrmicinae) leaf-cutting ant nests.

| Leaf-cutting ant colony                                     | Origin/lab                      | pH  |
|-------------------------------------------------------------|---------------------------------|-----|
| <i>Acromyrmex ambiguus</i> (Emery, 1888) colony L           | Uruguay, Flavio Roces           | 8.4 |
| <i>A. ambiguus</i> colony T                                 | Uruguay, Flavio Roces           | 5.2 |
| <i>A. ambiguus</i> colony W                                 | Uruguay, Flavio Roces           | 5.7 |
| <i>Acromyrmex niger</i> (Smith, 1858)                       | Brasil, Rainer Wirth            | 7.7 |
| <i>Acromyrmex octospinosus</i> (Reich, 1793)                | Colombia, Rainer Wirth          | 7.1 |
|                                                             |                                 |     |
| <i>Atta laevigata</i> (Smith, 1858) colony AI7              | Brasil, Flavio Roces            | 8.6 |
| <i>A. laevigata</i> colony AI9                              | Brasil, Flavio Roces            | 6.9 |
| <i>A. laevigata</i> colony AI11                             | Brasil, Flavio Roces            | 8.3 |
|                                                             |                                 |     |
| <i>Atta vollenweideri</i> (Forel 1893) colony A             | Uruguay, Flavio Roces           | 5.1 |
| <i>A. vollenweideri</i> colony D                            | Uruguay, Flavio Roces           | 5.3 |
| <i>A. vollenweideri</i> colony E                            | Uruguay, Flavio Roces           | 8.3 |
| <i>A. vollenweideri</i> colony Konstanz                     | Argentina, Christoph Kleineidam | 8.1 |
|                                                             |                                 |     |
| <i>Atta sexdens</i> (Linnaeus, 1758) colony AS1             | Brasil, Flavio Roces            | 8.6 |
| <i>A. sexdens</i> colony AS3                                | Brasil, Flavio Roces            | 8.0 |
| <i>A. sexdens</i> colony AS6                                | Brasil, Flavio Roces            | 6.3 |
|                                                             |                                 |     |
| <i>Acromyrmex lundii</i> (Guérin-Méneville, 1838) colony U2 | Uruguay, Flavio Roces           | 5.0 |
| <i>A. lundii</i> colony U3                                  | Uruguay, Flavio Roces           | 5.4 |
| <i>A. lundii</i> colony U4                                  | Uruguay, Flavio Roces           | 4.9 |
| <i>A. lundii</i> colony U5                                  | Uruguay, Flavio Roces           | 7.3 |



## References

- [1] Grob, K. 1973 Organic substances in potable water and in its precursor: part I. Methods for their determination by gas-liquid chromatography. *J. Chrom. A* **84**, 255-273.
- [2] Avalos, M., Garbeva, P., Raaijmakers, J.M. & van Wezel, G.P. 2019 Production of ammonia as a low-cost and long-distance antibiotic strategy by *Streptomyces* species. *ISME J*, 1-15.
- [3] Genfa, Z. & Dasgupta, P.K. 1989 Fluorometric measurement of aqueous ammonium ion in a flow injection system. *Anal. Chem.* **61**, 408-412.
- [4] Schmidt, K. & Spiteller, D. 2017 Ammonia released by *Streptomyces aburaviensis* induces droplet formation in *Streptomyces violaceoruber*. *J. Chem. Ecol.* **43**, 806-816.
